# Supplementary material
Source: MDPI journal article supplement (https://www.mdpi.com/2077-0472/13/2/255)
Supplement: s1 [file s1]

**Table S1.** Leaf rust severity in the field on differential lines in the North-Western Region of Russia in 1998–2013

| Line (cultivar) with <i>Lr</i> gene                                            | 1998   | 2004 | 2005    | 2006 | 2007 | 2009    | 2010 | 2011  | 2012 | 2013  |
|--------------------------------------------------------------------------------|--------|------|---------|------|------|---------|------|-------|------|-------|
| Resistant group (variation of disease severity from 0 to 10%)                  |        |      |         |      |      |         |      |       |      |       |
| Tc:Lr9, Lr19, Lr24, Lr25, Lr29                                                 | 0      | 0    | 0       | 0    | 0    | 0       | 0    | 0     | 0    | 0     |
| TcLr45, Lr41, Lr42, Lr43+24, Lr47                                              | -      | -    | -       | -    | 0    | 0       | 0    | 0     | 0    | 0     |
| Lr28                                                                           | 0      | 10MR | 3MR     | 0    | 0    | 0       | 0    | 0     | 0    | 0     |
| TcLr23                                                                         | 10MR   | 1MR  | 1-3MR   | 0    | 10MR | 0       | 0    | 1-5MR | 1MR  | 0     |
| TcLr35                                                                         | 1MR    | -    | -       | -    | -    | 1-3S    | 0    | 1S    | 1S   | 0     |
| Lr39                                                                           |        | -    | -       | -    | 5S   | 0       | 0    | 1-5S  | 1-5S | 5S    |
| Lr40                                                                           | -      | -    | -       | -    | 5S   | 0       | 0    | 1-5S  | 0    | 1-5S  |
| Lr48                                                                           | -      | -    | -       | -    | 1-3S | 0       | 0    | 1-5S  | 1-5S | 5-10S |
| Lr49                                                                           |        | -    | -       | -    | 0    | 0       | 0    | 1-5S  | 0    | 0     |
| Lr50                                                                           | -      | -    | -       | -    | 1MR  | 0       | 0    | 0     | 0    | 0     |
| Moderately susceptible group (variation of disease severity from 1 to 30%)     |        |      |         |      |      |         |      |       |      |       |
| TcLr12                                                                         | 30MS   | 30S  | 20MS    | 10S  | 30S  | 30S     | 20S  | 20R   | 20S  | 10S   |
| TcLr13                                                                         | 50S    | 50S  | 15MS    | 5S   | 30S  | 30S     | 30S  | 10S   | 10S  | 10S   |
| TcLr21                                                                         | 5MS    | 5MS  | 15MS    | 5S   | 20S  | -       | 5S   | 5S    | 5S   | 20S   |
| TcLr22a                                                                        | 5MS    | 10MS | 5MS     | 20S  | 30S  | 10S     | 5S   | 1S    | 5S   | 15S   |
| Lr27+31                                                                        | 1MR    | 20MS | 30MS    | 0    | 5S   | 0       | 10S  | 0     | 30S  | 30S   |
| TcLr44                                                                         | 20MS   | 20MS | 5MS     | 5S   | 30S  | 30S     | 15S  | 10S   | 10S  | 30S   |
| Lr46                                                                           | -      | -    | -       | -    | 30S  | 30S     | 20S  | 5S    | 5S   | 10S   |
| Highly variable resistance group (variation of disease severity from 5 to 80%) |        |      |         |      |      |         |      |       |      |       |
| TcLr11                                                                         | 100S   | 80S  | 80S     | 10S  | 70S  | 100S    | 50S  | 30S   | 70S  | 100S  |
| TcLr14b                                                                        | 100S   | 60S  | 80S     | 30S  | 50S  | 80-100S | 70S  | 20S   | 15S  | 70S   |
| TcLr16                                                                         | 100S   | 70S  | 80-100S | 50S  | 80S  | 80-100S | 30S  | 50S   | -    | 100S  |
| TcLr17                                                                         | 5-10MR | 70S  | 80-100S | 50S  | 20MS | 100S    | 50S  | 50S   | 70S  | 100S  |
| TcLr18                                                                         | 5MR    | 30S  | 30MS    | 50S  | 70S  | 80S     | 50S  | 30S   | 15S  | 5S    |
| TcLr32                                                                         | 30MS   | 30MS | 10MS    | 20S  | 50S  | 50S     | 50S  | 50S   | 10S  | 10S   |

|                                |      |      |         |      |     |         |        |        |        |      |
|--------------------------------|------|------|---------|------|-----|---------|--------|--------|--------|------|
| TcLr34                         | 5MS  | 20S  | 50S     | 20S  | 50S | 80S     | 50S    | 5S     | 5S     | 100S |
| Susceptible group              |      |      |         |      |     |         |        |        |        |      |
| TcLr1                          | 80S  | 70S  | 80-100S | 40S  | 80S | 70-80S  | 50S    | 80S    | 80S    | 100S |
| TcLr2a                         | 80S  | 70S  | 80-100S | 40S  | 80S | 100S    | 50-70S | 70     | 70S    | 100S |
| TcLr2b                         | 60S  | 70S  | 80-100S | 30S  | 80S | 80S     | 50-70S | 70S    | 70S    | 100S |
| TcLr2c                         | 100S | 70S  | 80-100S | 20S  | 70S | 100S    | 50-70S | 70S    | 90S    | 100S |
| TcLr3a                         | 100S | 90S  | 80-100S | 40S  | 70S | 70-100S | 50S    | 70S    | 70S    | 100S |
| TcLr3bg                        | 100S | 90S  | 80-100S | 30S  | 80S | 50S     | 50-70S | 70S    | 70S    | 100S |
| TcLr3ka                        | 100S | 70S  | 80-100S | 30S  | 80S | 50S     | 50S    | 70S    | 50S    | 100S |
| TcLr10                         | 100S | 90S  | 80-100S | 50S  | 80S | 100S    | 70S    | 90S    | 80S    | 100S |
| TcLr14a                        | 100S | 100S | 80-100S | 50S  | 70S | 100S    | 70S    | 70S    | 90S    | 100S |
| TcLr15                         | 100S | 80S  | 80-100S | 40S  | 70S | 80-100S | 50S    | 50S    | 50S    | 100S |
| TcLr20                         | 100S | 50MS | 80-100S | 50-S | 60S | 100S    | 70S    | 10S    | 50S    | 100S |
| TcLr26                         | 50MS | 15MS | 50-80S  | 50S  | 70S | 80-100S | 50S    | 50S    | 50S    | 100S |
| TcLr30                         | 100S | 100S | 80-100S | 30S  | 80S | 100S    | 50S    | 50S    | 50S    | 100S |
| TcLr33                         | 100S | 70S  | 70-80S  | 30S  | 70S | 80-100S | 50S    | 50S    | 50S    | 100S |
| Thatcher (susceptible control) | 100S | 100S | 100S    | 50S  | 80S | 100S    | 50-70S | 70-90S | 60-90S | 100S |

Tc – isogenic Thatcher line with *Lr* gene, *Lr41* – KS90WGRC10, *Lr42* – KS91WGRC11, *Lr43+24* KS91WGRC16, *Lr47* – Pavon 76, *Lr28* – CS 2A12M, *Lr39* – KS86WGRC02, *Lr40* – KS89WGRC07, *Lr50* – KS96WGRC36, *Lr48* – CSP44, *Lr49* – VL404№8677, *Lr27+31* – Gatcher, *Lr46* – Pavon.

- Not evaluated

**Table S2.** Leaf rust severity in the field on differential lines in the North-West of Russia in 2014–2022

| Line (cultivar) with <i>Lr</i> gene                                                                                                                                                        | 2014    | 2015  | 2016 | 2017 | 2019   | 2020 | 2022 |
|--------------------------------------------------------------------------------------------------------------------------------------------------------------------------------------------|---------|-------|------|------|--------|------|------|
| Resistant group (variation of disease severity from 0 to 10%)                                                                                                                              |         |       |      |      |        |      |      |
| Tc: <i>Lr</i> 9, <i>Lr</i> 19, <i>Lr</i> 24, <i>Lr</i> 28, <i>Lr</i> 29, <i>Lr</i> 41, <i>Lr</i> 42, <i>Lr</i> 43+24, <i>Lr</i> 45, <i>Lr</i> 47, <i>Lr</i> 51, <i>Lr</i> 53, <i>Lr</i> 57 | 0       | 0     | 0    | 0    | 0      | 0    | 0    |
| Tc <i>Lr</i> 21                                                                                                                                                                            | 5S      | 5S    | 5S   | 5S   | 1S     | 0    | 0    |
| Tc <i>Lr</i> 22a                                                                                                                                                                           | 5S      | 0R    | 1S   | 1MR  | 0      | 1S   | 0    |
| Tc <i>Lr</i> 23                                                                                                                                                                            | 1MR     | 0     | 0    | 0    | 0      | 0    | 0    |
| Tc <i>Lr</i> 25                                                                                                                                                                            | 0       | -     | -    | -    | 1S     | 0    | 0    |
| Tc <i>Lr</i> 35                                                                                                                                                                            | 1S      | 0     | 0    | 1S   | 1S     | 1S   | 0    |
| Tc <i>Lr</i> 37                                                                                                                                                                            | 5S      | 0     | 0    | 0    | 0      | 1S   | 0    |
| <i>Lr</i> 39                                                                                                                                                                               | 5S      | 0     | 5S   | 5S   | 0      | 0    | 0    |
| <i>Lr</i> 40                                                                                                                                                                               | 5S      | 0     | 5S   | 5S   | 0      | 0    | 0    |
| <i>Lr</i> 48                                                                                                                                                                               | 5S      | 5S    | 5S   | 0    | 0      | 1MR  | 1MR  |
| <i>Lr</i> 49                                                                                                                                                                               | 1S      | 0     | 0    | 0    | 0      | 0    | 0    |
| <i>Lr</i> 50                                                                                                                                                                               | 0       | 0     | 1MR  | 0    | 0      | 0    | 0    |
| Tc <i>Lr</i> 64                                                                                                                                                                            | 10S     | 5S    | 1S   | 0    | 0      | 1S   | 1S   |
| Tc <i>Lr</i> 11                                                                                                                                                                            | 1S      | 10S   | 10S  | 10S  | 10S    | 5S   | 10S  |
| <i>Lr</i> 27+31                                                                                                                                                                            | -       | -     | 10S  | 5S   | 10S    | 10S  | 10S  |
| Tc <i>Lr</i> 32                                                                                                                                                                            | 10S     | 0     | 10S  | 10MS | 0      | 10MS | 0    |
| Tc <i>Lr</i> 44                                                                                                                                                                            | 5MR     | -     | 1S   | 0R   | 10S    | 10S  | 0    |
| Moderately resistant group (variation of disease severity from 1 to 30%)                                                                                                                   |         |       |      |      |        |      |      |
| Tc <i>Lr</i> 12                                                                                                                                                                            | 5MR     | 30S   | 30S  | 30S  | 5S     | 1S   | 5S   |
| Tc <i>Lr</i> 13                                                                                                                                                                            | 10S     | 30S   | 30S  | 30S  | 5S     | 5S   | 5S   |
| Highly variable resistance group (variation of disease severity from 5 to 80%)                                                                                                             |         |       |      |      |        |      |      |
| Tc <i>Lr</i> 14b                                                                                                                                                                           | 80S     | 5–10S | 15S  | 50S  | 20S    | 30S  | 70S  |
| Tc <i>Lr</i> 16                                                                                                                                                                            | 70–80S  | 100S  | 100S | 100S | 50S    | 30S  | 60S  |
| Tc <i>Lr</i> 17                                                                                                                                                                            | 50S     | 50S   | 100S | 100S | 30S    | 15S  | 60S  |
| Tc <i>Lr</i> 18                                                                                                                                                                            | 20S     | 50S   | 40S  | 1S   | 0      | 0    | 0    |
| Tc <i>Lr</i> 30                                                                                                                                                                            | 80–100S | 100S  | 100S | 15S  | 60S    | 50S  | 60S  |
| Tc <i>Lr</i> 34                                                                                                                                                                            | 30S     | 50S   | 20S  | 80S  | 30–50S | 10S  | 60S  |
| Tc <i>Lr</i> 33                                                                                                                                                                            | 80S     | 70S   | 30S  | 80S  | 10S    | 10S  | 60S  |

|                                |         |        |      |      |      |     |         |
|--------------------------------|---------|--------|------|------|------|-----|---------|
| <i>Lr46</i>                    | 70S     | 5S     | 50S  | 50S  | 15S  | 20S | 20S     |
| <i>TcLr67</i>                  | 100S    | 80S    | 100S | 100S | 30S  | 10S | 70S     |
| Susceptible group              |         |        |      |      |      |     |         |
| <i>TcLr1</i>                   | 80-100S | 100S   | 100S | 100S | 100S | 70S | 90S     |
| <i>TcLr2a</i>                  | 80-100S | 100S   | 100S | 100S | 100S | 70S | 90S     |
| <i>TcLr2b</i>                  | 80-100S | 100S   | 100S | 100S | 100S | 70S | 90S     |
| <i>TcLr2c</i>                  | 80-100S | 70-80S | 100S | 100S | 100S | 80S | 100S    |
| <i>TcLr3a</i>                  | 80-100S | 100S   | 100S | 100S | 100S | 60S | 100S    |
| <i>TcLr3bg</i>                 | 80-100S | 100S   | 100S | 100S | 100S | 60S | 80S     |
| <i>TcLr3ka</i>                 | 80-100S | 100S   | 100S | 100S | 100S | 60S | 70S     |
| <i>TcLr10</i>                  | 100S    | 100S   | 100S | 100S | 100S | 80S | 100S    |
| <i>TcLr14a</i>                 | 100S    | 100S   | 70S  | 60S  | 70S  | 60S | 70S     |
| <i>TcLr15</i>                  | 100S    | 100S   | 100  | 100S | 50S  | 60S | 90S     |
| <i>TcLr20</i>                  | 80-100S | 100S   | 100S | 100R | 70S  | 50S | 80S     |
| <i>TcLr26</i>                  | 80S     | 100S   | 100S | 100S | 100  | 80S | 90S     |
| Thatcher (susceptible control) | 80-100S | 100S   | 100S | 100S | 100S | 80S | 90-100S |
